# Supplementary material
Source: HighWire-hosted journal article supplement (https://bmjopen.bmj.com/content/12/4/e057950)
Supplement: inline-supplementary-material-1 [file inline-supplementary-material-1.pdf]

**Appendix 1: PRISMA-P (Preferred Reporting Items for Systematic review and Meta-Analysis Protocols) 2015 checklist: recommended items to address in a systematic review protocol\***

| Section and topic                 | Item No | Checklist item                                                                                                                                                                                  | Page number                                             |
|-----------------------------------|---------|-------------------------------------------------------------------------------------------------------------------------------------------------------------------------------------------------|---------------------------------------------------------|
| <b>ADMINISTRATIVE INFORMATION</b> |         |                                                                                                                                                                                                 |                                                         |
| Title:                            |         |                                                                                                                                                                                                 |                                                         |
| Identification                    | 1a      | Identify the report as a protocol of a systematic review                                                                                                                                        | Title; p.1                                              |
|                                   | Update  | 1b If the protocol is for an update of a previous systematic review, identify as such                                                                                                           | n/a                                                     |
| Registration                      | 2       | If registered, provide the name of the registry (such as PROSPERO) and registration number                                                                                                      | Abstract, Methods and Analysis, Study Records; pp.2,7,8 |
| Authors:                          |         |                                                                                                                                                                                                 |                                                         |
| Contact                           | 3a      | Provide name, institutional affiliation, e-mail address of all protocol authors; provide physical mailing address of corresponding author                                                       | Authors; p.1                                            |
| Contributions                     | 3b      | Describe contributions of protocol authors and identify the guarantor of the review                                                                                                             | Declaration; Authors' Contributions; p.13               |
| Amendments                        | 4       | If the protocol represents an amendment of a previously completed or published protocol, identify as such and list changes; otherwise, state plan for documenting important protocol amendments | n/a                                                     |
| Support:                          |         |                                                                                                                                                                                                 |                                                         |
| Sources                           | 5a      | Indicate sources of financial or other support for the review                                                                                                                                   | Declaration; Funding Statement; p.12                    |
| Sponsor                           | 5b      | Provide name for the review funder and/or sponsor                                                                                                                                               | Declaration; Funding                                    |

|                           |     |                                                                                                                                                                                                                               |                                                         |
|---------------------------|-----|-------------------------------------------------------------------------------------------------------------------------------------------------------------------------------------------------------------------------------|---------------------------------------------------------|
| Role of sponsor or funder | 5c  | Describe roles of funder(s), sponsor(s), and/or institution(s), if any, in developing the protocol                                                                                                                            | Statement; p.12<br>Declaration; Funding statement; p.12 |
| <b>INTRODUCTION</b>       |     |                                                                                                                                                                                                                               |                                                         |
| Rationale                 | 6   | Describe the rationale for the review in the context of what is already known                                                                                                                                                 | Introduction; pp.4-6                                    |
| Objectives                | 7   | Provide an explicit statement of the question(s) the review will address with reference to participants, interventions, comparators, and outcomes (PICO)                                                                      | Methods and Analysis; PICO Question; p.7                |
| <b>METHODS</b>            |     |                                                                                                                                                                                                                               |                                                         |
| Eligibility criteria      | 8   | Specify the study characteristics (such as PICO, study design, setting, time frame) and report characteristics (such as years considered, language, publication status) to be used as criteria for eligibility for the review | Methods and Analysis; pp.7-8                            |
| Information sources       | 9   | Describe all intended information sources (such as electronic databases, contact with study authors, trial registers or other grey literature sources) with planned dates of coverage                                         | Methods and Analysis; Information Sources; pp.7-8       |
| Search strategy           | 10  | Present draft of search strategy to be used for at least one electronic database, including planned limits, such that it could be repeated                                                                                    | Supplementary material file; pp.5-18                    |
| Study records:            |     |                                                                                                                                                                                                                               |                                                         |
| Data management           | 11a | Describe the mechanism(s) that will be used to manage records and data throughout the review                                                                                                                                  | Methods and Analysis; pp.7-9                            |
| Selection process         | 11b | State the process that will be used for selecting studies (such as two independent reviewers) through each phase of the review (that is, screening, eligibility and inclusion in meta-analysis)                               | Methods and Analysis; Study                             |

|                                    |     |                                                                                                                                                                                                                                                  |                                                                                         |
|------------------------------------|-----|--------------------------------------------------------------------------------------------------------------------------------------------------------------------------------------------------------------------------------------------------|-----------------------------------------------------------------------------------------|
| Data collection process            | 11c | Describe planned method of extracting data from reports (such as piloting forms, done independently, in duplicate), any processes for obtaining and confirming data from investigators                                                           | Selection Process; p.8<br>Methods and Analysis; Data Collection Process; p.9<br>pp.6, 8 |
| Data items                         | 12  | List and define all variables for which data will be sought (such as PICO items, funding sources), any pre-planned data assumptions and simplifications                                                                                          |                                                                                         |
| Outcomes and prioritization        | 13  | List and define all outcomes for which data will be sought, including prioritization of main and additional outcomes, with rationale                                                                                                             | Methods and Analysis; PICO Question; p.6                                                |
| Risk of bias in individual studies | 14  | Describe anticipated methods for assessing risk of bias of individual studies, including whether this will be done at the outcome or study level, or both; state how this information will be used in data synthesis                             | Methods and Analysis; Quality Assessment; pp.9-10                                       |
| Data synthesis                     | 15a | Describe criteria under which study data will be quantitatively synthesised                                                                                                                                                                      | Methods and analysis; Data Synthesis and Best-Evidence Synthesis; p.11                  |
|                                    | 15b | If data are appropriate for quantitative synthesis, describe planned summary measures, methods of handling data and methods of combining data from studies, including any planned exploration of consistency (such as $I^2$ , Kendall's $\tau$ ) | Methods and Analysis; Data Synthesis and Best-Evidence Synthesis; p.11                  |
|                                    | 15c | Describe any proposed additional analyses (such as sensitivity or subgroup analyses, meta-regression)                                                                                                                                            | Methods and Analysis; Subgroup Analysis; p.10                                           |
|                                    | 15d | If quantitative synthesis is not appropriate, describe the type of summary planned                                                                                                                                                               | Methods and Analysis;                                                                   |

|                                   |                                                                                                                                  | Quality Assessment; pp.9-10 |
|-----------------------------------|----------------------------------------------------------------------------------------------------------------------------------|-----------------------------|
| Meta-bias(es)                     | 16 Specify any planned assessment of meta-bias(es) (such as publication bias across studies, selective reporting within studies) | n/a                         |
| Confidence in cumulative evidence | 17 Describe how the strength of the body of evidence will be assessed (such as GRADE)                                            | n/a                         |

**\* It is strongly recommended that this checklist be read in conjunction with the PRISMA-P Explanation and Elaboration (cite when available) for important clarification on the items. Amendments to a review protocol should be tracked and dated. The copyright for PRISMA-P (including checklist) is held by the PRISMA-P Group and is distributed under a Creative Commons Attribution Licence 4.0.**

*From: Shamseer L, Moher D, Clarke M, Ghersi D, Liberati A, Petticrew M, Shekelle P, Stewart L, PRISMA-P Group. Preferred reporting items for systematic review and meta-analysis protocols (PRISMA-P) 2015: elaboration and explanation. BMJ. 2015 Jan 2;349(jan02 1):g7647*

**Appendix 2: Search strategies****Medline (OVID)**

| <b>Psychometrics properties</b> |                                                                                                                                                                                                                                                                                                                                                                                                                                                                                                                                                                                                                                                                                                                                                                                                                                                                                                                                                                                                                                                                                                                                                                                                                                                                                                                                                                                                                                                                                                                                                                                                                                                                                                                                                                                                                                                                                                                                                                                                                                                                                                                                                                                                                                                                                                                                                                                                                                                                                                                                                                                                                             | <b>Results</b> |
|---------------------------------|-----------------------------------------------------------------------------------------------------------------------------------------------------------------------------------------------------------------------------------------------------------------------------------------------------------------------------------------------------------------------------------------------------------------------------------------------------------------------------------------------------------------------------------------------------------------------------------------------------------------------------------------------------------------------------------------------------------------------------------------------------------------------------------------------------------------------------------------------------------------------------------------------------------------------------------------------------------------------------------------------------------------------------------------------------------------------------------------------------------------------------------------------------------------------------------------------------------------------------------------------------------------------------------------------------------------------------------------------------------------------------------------------------------------------------------------------------------------------------------------------------------------------------------------------------------------------------------------------------------------------------------------------------------------------------------------------------------------------------------------------------------------------------------------------------------------------------------------------------------------------------------------------------------------------------------------------------------------------------------------------------------------------------------------------------------------------------------------------------------------------------------------------------------------------------------------------------------------------------------------------------------------------------------------------------------------------------------------------------------------------------------------------------------------------------------------------------------------------------------------------------------------------------------------------------------------------------------------------------------------------------|----------------|
| <b>1</b>                        | instrumentation.fs OR validation study.pt OR exp reproducibility of results/ OR psychometrics/ OR observer variation/ OR discriminant analysis/                                                                                                                                                                                                                                                                                                                                                                                                                                                                                                                                                                                                                                                                                                                                                                                                                                                                                                                                                                                                                                                                                                                                                                                                                                                                                                                                                                                                                                                                                                                                                                                                                                                                                                                                                                                                                                                                                                                                                                                                                                                                                                                                                                                                                                                                                                                                                                                                                                                                             |                |
| <b>2</b>                        | (reproducib* OR psychometr* OR clinimetr* OR clinometr* OR observer variation OR reliab* OR valid* OR coefficient OR internal consistency OR (cronbach* AND (alpha OR alphas)) OR item correlation* OR item selection* OR item reduction*). <b>ti,ab</b> OR (agreement OR precision OR imprecision OR precise values). <b>tw</b> OR (test retest OR (test AND retest) OR (reliab* AND (test OR retest)) OR stability OR interrater OR inter rater OR intrarater OR intra rater OR intertester OR inter tester OR intratester OR intra tester OR interobserver OR inter observer OR intraobserver OR intra observer OR intertechnician OR inter technician OR intratechnician OR intra technician OR interexaminer OR inter examiner OR intraexaminer OR intra examiner OR interassay OR inter assay OR intraassay OR intra assay OR interindividual OR inter individual OR intraindividual OR intra individual OR interparticipant OR inter participant OR intraparticipant OR intra participant OR kappa OR kappa's OR kappas OR coefficient of variation). <b>ti,ab</b> OR (repeatab* OR ((replicab* OR repeated) AND (measure OR measures OR findings OR result OR results OR test OR tests))). <b>tw</b> OR (generaliza* OR generalisa* OR concordance OR (intraclass AND correlation*) OR discriminative OR known group OR factor analysis OR factor analyses OR factor structure OR factor structures OR dimensionality OR subscale* OR multitrait scaling analysis OR multitrait scaling analyses OR item discriminant OR interscale correlation* OR ((error OR errors) AND (measure*OR correlat* OR evaluat* OR accuracy OR accurate OR precision OR mean)) OR individual variability OR interval variability OR rate variability OR variability analysis OR (uncertainty AND (measurement OR measuring)) OR standard error of measurement OR sensitiv* OR responsive* OR (limit AND detection) OR minimal detectable concentration OR interpretab* OR (small* AND (real OR detectable) AND (change OR difference)) OR meaningful change OR minimal important change OR minimal important difference OR minimally important change OR minimally important difference OR minimal detectable change OR minimal detectable difference OR minimally detectable change OR minimally detectable difference OR minimal real change OR minimal real difference OR minimally real change OR minimally real difference OR ceiling effect OR floor effect OR Item response model OR IRT OR Rasch OR Differential item functioning OR DIF OR computer adaptive testing OR itembank OR cross cultural equivalence). <b>ti,ab</b> |                |
| <b>3</b>                        | <b>1 OR 2</b>                                                                                                                                                                                                                                                                                                                                                                                                                                                                                                                                                                                                                                                                                                                                                                                                                                                                                                                                                                                                                                                                                                                                                                                                                                                                                                                                                                                                                                                                                                                                                                                                                                                                                                                                                                                                                                                                                                                                                                                                                                                                                                                                                                                                                                                                                                                                                                                                                                                                                                                                                                                                               | <b>4274030</b> |

| <b>Patient-reported outcome measurement instruments</b>   |                                                                                                                                                                                                                                                                                                                                                                                                                                  |                |
|-----------------------------------------------------------|----------------------------------------------------------------------------------------------------------------------------------------------------------------------------------------------------------------------------------------------------------------------------------------------------------------------------------------------------------------------------------------------------------------------------------|----------------|
| <b>4</b>                                                  | "patient reported outcome measures"/ or "surveys and questionnaires"/ or self report/ or quality of life/                                                                                                                                                                                                                                                                                                                        |                |
| <b>5</b>                                                  | ((patient? OR self) <b>adj2</b> (report* OR relate* OR declar* OR rating* OR assess* OR examin* OR monitor* OR administer* OR rate* OR rating* or based or appraisal* or appraised or evaluat*) <b>adj2</b> (outcome* OR symptom*)) or PROM? Or PRO or PROS OR (quality adj2 life) OR HRQL or HRQoL or QL or QoL OR HR-PRO or HRPRO). <b>ti,ab,kw</b>                                                                            |                |
| <b>6</b>                                                  | ((disability or function* or subjective or utility or utilities or wellbeing or well being) <b>adj3</b> (outcome or outcomes or index or indices or instrument or instruments or measure or measures or questionnaire or questionnaires or profile or profiles or scale or scales or score or scores or scoring or status or survey or surveys or measure*)). <b>ti,ab,kw</b>                                                    |                |
| <b>Clinician reported outcome measurement instruments</b> |                                                                                                                                                                                                                                                                                                                                                                                                                                  |                |
| <b>7</b>                                                  | exp outcome assessment health care/                                                                                                                                                                                                                                                                                                                                                                                              |                |
| <b>8</b>                                                  | (Clinician* reported outcome* or CROS or clinRO or clinROs OR ((clinical or clinician* or expert* or health professional* OR physician* OR doctor*) <b>adj2</b> (judgement* or interpretation* or observation* or assessment* or measure*))). <b>ti,ab</b>                                                                                                                                                                       |                |
| <b>9</b>                                                  | <b>OR/4-8</b>                                                                                                                                                                                                                                                                                                                                                                                                                    | <b>2423430</b> |
| <b>Peripheral neuropathy</b>                              |                                                                                                                                                                                                                                                                                                                                                                                                                                  |                |
| <b>10</b>                                                 | peripheral nervous system diseases/ or brachial plexus neuropathies/ or exp complex regional pain syndromes/ or neuralgia/ or metatarsalgia/ or neuritis/ or polyneuropathies/ or polyradiculoneuropathy/ or small fiber neuropathy/ or neural conduction/ or cranial nerve injuries/ or peripheral nerve injuries/                                                                                                              |                |
| <b>11</b>                                                 | (PNS disease* or peripheral nervous system disease* or neuropath* or complex regional pain syndrome* or neuralgia* or neuritis or neurodinya* or (nerve* <b>adj2</b> (pain* or injur* or disease* or affect* or damage* or degeneration*)) or causalgia* or hyperesthesi* or paresthesi* or hypesthesi* or paralysis or polyneuropath* or polyradiculo* or polyneuritis or burning feet syndrome or metatarsalgia). <b>ti,ab</b> |                |
| <b>12</b>                                                 | neurologic manifestations/                                                                                                                                                                                                                                                                                                                                                                                                       |                |
| <b>13</b>                                                 | ((neurologic* <b>adj2</b> (manifestation* or deficit* or sign or signs or symptom* or finding* or dysfunction*))). <b>ti,ab</b>                                                                                                                                                                                                                                                                                                  |                |
| <b>14</b>                                                 | sensation disorders/ or exp somatosensory disorders/ or sensory thresholds/ or differential threshold/ or pain threshold/ or signal detection, psychological/ or "evoked potentials, somatosensory"/ or touch perception/ or exp nociceptive pain/ or pain, referred/ or exp pain perception/ or breakthrough pain/ or facial pain/ or neurotoxicity syndromes/ or hand-foot syndrome/                                           |                |
| <b>15</b>                                                 | ((sensation* or sense* or sensivity or sensorimotor or sensory or somatosensory or nociceptive or somatic or tissue* or tactile or touch* or pinprick or thermal or burning or shooting or deafferentation or differential or referred or percept* or facial or breakthrough) <b>adj3</b> (pain* or disorder* or disease* or disturb* or distortion*                                                                             |                |

|                              |                                                                                                                                                                                                                                                                                                                                                                                                                                                                                                                                                                   |                |
|------------------------------|-------------------------------------------------------------------------------------------------------------------------------------------------------------------------------------------------------------------------------------------------------------------------------------------------------------------------------------------------------------------------------------------------------------------------------------------------------------------------------------------------------------------------------------------------------------------|----------------|
|                              | or discomfort* or dysfunction* or disruption* or impair* or symptom* or change* or abnormal* or mechanical or deficit* or limit* or loss or diminish* or reduc* or amplificat* or hyperesthetic or alter* or affect* or gating or threshold*)) or pain threshold* or hyperalgesi* or allodynia* or formication* or tingling or hypersensitivity or oxyesthesi* or electric shock like or vibration* or nocicept* or neurotoxi* or hand foot syndrome*). <b>ti,ab</b>                                                                                              |                |
| <b>16</b>                    | exp "musculoskeletal and neural physiological phenomena"/ or muscular diseases/ or neuromuscular manifestations/ or muscle weakness/ or muscle cramp/ or arthralgia/ or exp gait disorders, neurologic/ or proprioception/ or weight-bearing/ or evoked potentials, motor/                                                                                                                                                                                                                                                                                        |                |
| <b>17</b>                    | ((motor* or muscle* or muscular or neuromuscular or functional* or movement* or walk* or gait* or balance or strength or tendon* or joint* or reflex* or tonus) <b>adj3</b> (pain* or disorder* or disturb* or discomfort* or dysfunction* or disruption* or impair* or symptom* or change* or abnormal* or mechanical or deficit* or limit* or loss or diminish* or reduc* or alter* or stabilit* or postural or weak* or fatigue) or propriocepti* or arthralgia* or myalgia* or polyarthralgia* or numbness or foot drop or footdrop or cramp*). <b>ti,ab.</b> |                |
| <b>18</b>                    | <b>OR/10-17</b>                                                                                                                                                                                                                                                                                                                                                                                                                                                                                                                                                   | <b>2942852</b> |
| <b>CIPN</b>                  |                                                                                                                                                                                                                                                                                                                                                                                                                                                                                                                                                                   |                |
| <b>19</b>                    | ((chemotherapy induced adj2 neuropath*) or CIPN). <b>ti,ab</b>                                                                                                                                                                                                                                                                                                                                                                                                                                                                                                    |                |
| <b>Antineoplastic agents</b> |                                                                                                                                                                                                                                                                                                                                                                                                                                                                                                                                                                   |                |
| <b>20</b>                    | Exp antineoplastic agents/ or antineoplastic combined chemotherapy protocols/                                                                                                                                                                                                                                                                                                                                                                                                                                                                                     |                |
| <b>21</b>                    | (antineoplastic* or chemotherap* or ((anticancer or antitumo?) <b>adj3</b> (agent or agents or drug*))). <b>ti,ab</b>                                                                                                                                                                                                                                                                                                                                                                                                                                             |                |
| <b>22</b>                    | <b>20 OR 21</b>                                                                                                                                                                                                                                                                                                                                                                                                                                                                                                                                                   | <b>1408051</b> |
| <b>23</b>                    | <b>3 AND 9 AND 18 AND 22</b>                                                                                                                                                                                                                                                                                                                                                                                                                                                                                                                                      | <b>2741</b>    |
| <b>24</b>                    | <b>3 AND 9 AND 19</b>                                                                                                                                                                                                                                                                                                                                                                                                                                                                                                                                             | <b>167</b>     |
| <b>25</b>                    | <b>23 OR 24</b>                                                                                                                                                                                                                                                                                                                                                                                                                                                                                                                                                   | <b>2741</b>    |
| <b>Exclusion Filters</b>     |                                                                                                                                                                                                                                                                                                                                                                                                                                                                                                                                                                   |                |
| <b>26</b>                    | (address OR case reports OR comment OR directory OR editorial OR festschrift OR lectures OR legal cases OR legislation OR letter OR news OR newspaper article OR patient education handout OR popular work OR congress OR practice guideline). <b>pt</b>                                                                                                                                                                                                                                                                                                          |                |
| <b>27</b>                    | exp biography/ OR exp consensus development conference/                                                                                                                                                                                                                                                                                                                                                                                                                                                                                                           |                |
| <b>28</b>                    | <b>26 or 27</b>                                                                                                                                                                                                                                                                                                                                                                                                                                                                                                                                                   | <b>4234403</b> |
| <b>29</b>                    | <b>25 NOT 28</b>                                                                                                                                                                                                                                                                                                                                                                                                                                                                                                                                                  | <b>2562</b>    |

**Embase (OVID)**

| <b>Psychometrics properties</b>             |                                                                                                                                                                                                                                                                                                                                                                                                                                                                                                                                                                                                                                                                                                                                                                                                                                                                                                                                                                                                                                                                                                                                                                                                                                                                                                                                                                                                                                                                                                                                                                                                                                                                                                                                                                                                                                                                                                                                                                                                                                                                                                                                                                                                                                                                                                                                                                                                                                                                                                                                                                                                                           | <b>Results</b> |
|---------------------------------------------|---------------------------------------------------------------------------------------------------------------------------------------------------------------------------------------------------------------------------------------------------------------------------------------------------------------------------------------------------------------------------------------------------------------------------------------------------------------------------------------------------------------------------------------------------------------------------------------------------------------------------------------------------------------------------------------------------------------------------------------------------------------------------------------------------------------------------------------------------------------------------------------------------------------------------------------------------------------------------------------------------------------------------------------------------------------------------------------------------------------------------------------------------------------------------------------------------------------------------------------------------------------------------------------------------------------------------------------------------------------------------------------------------------------------------------------------------------------------------------------------------------------------------------------------------------------------------------------------------------------------------------------------------------------------------------------------------------------------------------------------------------------------------------------------------------------------------------------------------------------------------------------------------------------------------------------------------------------------------------------------------------------------------------------------------------------------------------------------------------------------------------------------------------------------------------------------------------------------------------------------------------------------------------------------------------------------------------------------------------------------------------------------------------------------------------------------------------------------------------------------------------------------------------------------------------------------------------------------------------------------------|----------------|
| <b>1</b>                                    | devices/ OR validation study/ OR reproducibility/ OR exp psychometry/ or observer variation/ OR discriminant analysis/ OR validity/                                                                                                                                                                                                                                                                                                                                                                                                                                                                                                                                                                                                                                                                                                                                                                                                                                                                                                                                                                                                                                                                                                                                                                                                                                                                                                                                                                                                                                                                                                                                                                                                                                                                                                                                                                                                                                                                                                                                                                                                                                                                                                                                                                                                                                                                                                                                                                                                                                                                                       |                |
| <b>2</b>                                    | (reproducib* OR psychometr* OR clinimetr* OR clinometr* OR observer variation OR reliab* OR valid* OR coefficient OR internal consistency OR (cronbach* AND (alpha OR alphas)) OR item correlation* OR item selection* OR item reduction*). <b>ti,ab</b> OR (agreement OR precision OR imprecision OR precise values). <b>tw</b> OR (test retest OR (test AND retest) OR (reliab* AND (test OR retest)) OR stability OR interrater OR inter rater OR intrarater OR intra rater OR intertester OR inter tester OR intratester OR intra tester OR interobserver OR inter observer OR intraobserver OR intra observer OR intertechnician OR inter technician OR intratechnician OR intra technician OR interexaminer OR inter examiner OR intraexaminer OR intra examiner OR interassay OR inter assay OR intraassay OR intra assay OR interindividual OR inter individual OR intraindividual OR intra individual OR interparticipant OR inter participant OR intraparticipant OR intra participant OR kappa OR kappa's OR kappas OR coefficient of variation). <b>ti,ab</b> OR (repeat* OR ((replicab* OR repeated) AND (measure OR measures OR findings OR result OR results OR test OR tests))). <b>tw</b> OR (generaliza* OR generalisa* OR concordance OR (intraclass AND correlation*) OR discriminative OR known group OR factor analysis OR factor analyses OR factor structure OR factor structures OR dimensionality OR subscale* OR multitrait scaling analysis OR multitrait scaling analyses OR item discriminant OR interscale correlation* OR ((error OR errors) AND (measure*OR correlat* OR evaluat* OR accuracy OR accurate OR precision OR mean)) OR individual variability OR interval variability OR rate variability OR variability analysis OR (uncertainty AND (measurement OR measuring)) OR standard error of measurement OR sensitiv* OR responsive* OR (limit AND detection) OR minimal detectable concentration OR interpretab* OR (small* AND (real OR detectable) AND (change OR difference)) OR meaningful change OR minimal important change OR minimal important difference OR minimally important change OR minimally important difference OR minimal detectable change OR minimal detectable difference OR minimally detectable change OR minimally detectable difference OR minimal real change OR minimal real difference OR minimally real change OR minimally real difference OR ceiling effect OR floor effect OR Item response model OR IRT OR Rasch OR Differential item functioning OR DIF OR computer adaptive testing OR itembank OR cross cultural equivalence). <b>ti,ab</b> |                |
| <b>3</b>                                    | <b>1 OR 2</b>                                                                                                                                                                                                                                                                                                                                                                                                                                                                                                                                                                                                                                                                                                                                                                                                                                                                                                                                                                                                                                                                                                                                                                                                                                                                                                                                                                                                                                                                                                                                                                                                                                                                                                                                                                                                                                                                                                                                                                                                                                                                                                                                                                                                                                                                                                                                                                                                                                                                                                                                                                                                             | <b>5504013</b> |
| <b>Patient-Reported outcome measurement</b> |                                                                                                                                                                                                                                                                                                                                                                                                                                                                                                                                                                                                                                                                                                                                                                                                                                                                                                                                                                                                                                                                                                                                                                                                                                                                                                                                                                                                                                                                                                                                                                                                                                                                                                                                                                                                                                                                                                                                                                                                                                                                                                                                                                                                                                                                                                                                                                                                                                                                                                                                                                                                                           |                |
| <b>4</b>                                    | patient-reported outcome measure/ OR questionnaire/ OR self report/ OR quality of life/                                                                                                                                                                                                                                                                                                                                                                                                                                                                                                                                                                                                                                                                                                                                                                                                                                                                                                                                                                                                                                                                                                                                                                                                                                                                                                                                                                                                                                                                                                                                                                                                                                                                                                                                                                                                                                                                                                                                                                                                                                                                                                                                                                                                                                                                                                                                                                                                                                                                                                                                   |                |



|                                                |                                                                                                                                                                                                                                                                                                                                                                                                                                                                                                                                                                                        |                |
|------------------------------------------------|----------------------------------------------------------------------------------------------------------------------------------------------------------------------------------------------------------------------------------------------------------------------------------------------------------------------------------------------------------------------------------------------------------------------------------------------------------------------------------------------------------------------------------------------------------------------------------------|----------------|
| 5                                              | ((patient? OR self) <b>adj2</b> (report* OR relate* OR declar* OR rating* OR assess* OR examin* OR monitor* OR administer* OR rate* OR rating* or based or appraisal* or appraised or evaluat*) <b>adj2</b> (outcome* OR symptom*) or PROM? Or PRO or PROS OR (quality adj2 life) OR HRQL or HRQoL or QL or QoL OR HR-PRO or HRPRO). <b>ti,ab,kw</b>                                                                                                                                                                                                                                   |                |
| 6                                              | ((disability or function* or subjective or utility or utilities or wellbeing or well being) <b>adj3</b> (outcome or outcomes or index or indices or instrument or instruments or measure or measures or questionnaire or questionnaires or profile or profiles or scale or scales or score or scores or scoring or status or survey or surveys or measure*)). <b>ti,ab,kw</b>                                                                                                                                                                                                          |                |
| <b>Clinician reported outcomes measurement</b> |                                                                                                                                                                                                                                                                                                                                                                                                                                                                                                                                                                                        |                |
| 7                                              | exp outcome assessment/                                                                                                                                                                                                                                                                                                                                                                                                                                                                                                                                                                |                |
| 8                                              | (Clinician* reported outcome* or CROS or clinRO or clinROs OR ((clinical or clinician* or expert* or health professional* OR physician* OR doctor*) <b>adj2</b> (judgement* or interpretation* or observation* or assessment* or measure*))). <b>ti,ab</b>                                                                                                                                                                                                                                                                                                                             |                |
| 9                                              | <b>OR/4-8</b>                                                                                                                                                                                                                                                                                                                                                                                                                                                                                                                                                                          | <b>2786142</b> |
| <b>Peripheral neuropathy</b>                   |                                                                                                                                                                                                                                                                                                                                                                                                                                                                                                                                                                                        |                |
| 10                                             | peripheral neuropathy/ OR brachial plexus neuropathy/ OR exp complex regional pain syndrome/ OR neuralgia/ OR metatarsalgia/ OR neuritis/ OR polyneuropathy/ OR polyradiculoneuropathy/ OR small fiber neuropathy/ OR nerve conduction/ OR cranial nerve injury/ OR peripheral nerve injury/                                                                                                                                                                                                                                                                                           |                |
| 11                                             | (PNS disease* or peripheral nervous system disease* or neuropath* or complex regional pain syndrome* or neuralgia* or neuritis or neurodinya* or (nerve* <b>adj2</b> (pain* or injur* or disease* or affect* or damage* or degeneration*)) or causalgia* or hyperesthesi* or paresthesi* or hypesthesi* or paralysis or polyneuropath* or polyradiculo* or polyneuritis or burning feet syndrome or metatarsalgia). <b>ti,ab</b>                                                                                                                                                       |                |
| 12                                             | neurologic disease/                                                                                                                                                                                                                                                                                                                                                                                                                                                                                                                                                                    |                |
| 13                                             | ((neurologic* <b>adj2</b> (manifestation* or deficit* or sign or signs or symptom* or finding* or dysfunction*))). <b>ti,ab</b>                                                                                                                                                                                                                                                                                                                                                                                                                                                        |                |
| 14                                             | sensory dysfunction/ OR exp somatosensory disorder/ OR perceptive threshold/ OR differential threshold/ OR pain threshold/ OR signal detection/ OR somatosensory evoked potential/ OR touch/ OR exp nociceptive pain/ OR referred pain/ OR exp nociception/ OR breakthrough pain/ OR face pain/ OR neurotoxicity/ OR hand foot syndrome/                                                                                                                                                                                                                                               |                |
| 15                                             | ((sensation* or sense* or sensivity or sensorimotor or sensory or somatosensory or nociceptive or somatic or tissue* or tactile or touch* or pinprick or thermal or burning or shooting or deafferentation or differential or referred or percept* or facial or breakthrough) <b>adj3</b> (pain* or disorder* or disease* or disturb* or distortion* or discomfort* or dysfunction* or disruption* or impair* or symptom* or change* or abnormal* or mechanical or deficit* or limit* or loss or diminish* or reduc* or amplificat* or hyperesthetic or alter* or affect* or gating or |                |

|                              |                                                                                                                                                                                                                                                                                                                                                                                                                                                                                                                                                                   |                |
|------------------------------|-------------------------------------------------------------------------------------------------------------------------------------------------------------------------------------------------------------------------------------------------------------------------------------------------------------------------------------------------------------------------------------------------------------------------------------------------------------------------------------------------------------------------------------------------------------------|----------------|
|                              | threshold*)) or pain threshold* or hyperalgesi* or allodynia* or formication* or tingling or hypersensitivity or oxyesthesi* or electric shock like or vibration* or nocicept* or neurotoxi* or hand foot syndrome*). <b>ti,ab</b>                                                                                                                                                                                                                                                                                                                                |                |
| 16                           | "biological phenomena and functions concerning organ systems"/ OR muscle disease/ OR neuromuscular disease/ OR muscle weakness/ OR muscle cramp/ OR arthralgia/ OR exp neurologic gait disorder/ OR proprioception/ OR weight bearing/ OR motor evoked potential/                                                                                                                                                                                                                                                                                                 |                |
| 17                           | ((motor* or muscle* or muscular or neuromuscular or functional* or movement*or walk* or gait* or balance or strength or tendon*or joint* or reflex* or tonus) <b>adj3</b> (pain* or disorder* or disturb* or discomfort* or dysfunction* or disruption* or impair* or symptom* or change* or abnormal* or mechanical or deficit* or limit* or loss or diminish* or reduc* or alter* or disabilit* or postural or weak* or fatigue) or propriocepti* or arthralgia* or myalgia* or polyarthralgia* or numbness or foot drop or footdrop or cramp*). <b>ti,ab</b> . |                |
| 18                           | <b>OR/10-17</b>                                                                                                                                                                                                                                                                                                                                                                                                                                                                                                                                                   | <b>2081962</b> |
| <b>CIPN</b>                  |                                                                                                                                                                                                                                                                                                                                                                                                                                                                                                                                                                   |                |
| 19                           | chemotherapy-induced peripheral neuropathy/                                                                                                                                                                                                                                                                                                                                                                                                                                                                                                                       |                |
| 20                           | ((chemotherapy induced <b>adj2</b> neuropath*) or CIPN). <b>ti,ab</b>                                                                                                                                                                                                                                                                                                                                                                                                                                                                                             |                |
| 21                           | <b>19 OR 20</b>                                                                                                                                                                                                                                                                                                                                                                                                                                                                                                                                                   | <b>2860</b>    |
| <b>Antineoplastic agents</b> |                                                                                                                                                                                                                                                                                                                                                                                                                                                                                                                                                                   |                |
| 22                           | exp antineoplastic agent/ OR combination chemotherapy/                                                                                                                                                                                                                                                                                                                                                                                                                                                                                                            |                |
| 23                           | (antineoplastic* or chemotherap* or ((anticancer or antitumo?) <b>adj3</b> (agent or agents or drug*))). <b>ti,ab</b>                                                                                                                                                                                                                                                                                                                                                                                                                                             |                |
| 24                           | <b>22 OR 23</b>                                                                                                                                                                                                                                                                                                                                                                                                                                                                                                                                                   | <b>2717079</b> |
| 25                           | <b>3 AND 9 AND 18 AND 24</b>                                                                                                                                                                                                                                                                                                                                                                                                                                                                                                                                      | <b>5799</b>    |
| 26                           | <b>3 AND 9 AND 21</b>                                                                                                                                                                                                                                                                                                                                                                                                                                                                                                                                             | <b>426</b>     |
| 27                           | <b>25 OR 26</b>                                                                                                                                                                                                                                                                                                                                                                                                                                                                                                                                                   | <b>5802</b>    |
| <b>Exclusion Filters</b>     |                                                                                                                                                                                                                                                                                                                                                                                                                                                                                                                                                                   |                |
| 28                           | (editorial or letter).pt                                                                                                                                                                                                                                                                                                                                                                                                                                                                                                                                          |                |
| 29                           | literature/ or case report/ or directory/ or editorial/ or interview/ or law/ or publication/ or consensus development/ or practice guideline/                                                                                                                                                                                                                                                                                                                                                                                                                    |                |
| 30                           | <b>28 OR 29</b>                                                                                                                                                                                                                                                                                                                                                                                                                                                                                                                                                   | <b>5107933</b> |
| 31                           | <b>27 NOT 30</b>                                                                                                                                                                                                                                                                                                                                                                                                                                                                                                                                                  | <b>5188</b>    |

**CINAHL:**

| <b>Psychometrics properties</b> |                                                                                                                                                                                                                                                                                                                                                                                                                                                                                                                                                                                                                                                                                                                                                                                                                                                                                                                                                                                                                                                                                                                                                                                                                                                                                                                                                                                                                                                                                                                                                                                                                                                                                                                                                                                                                                                                                                                                                                                                                                                                                                                                                                                                                                                                                                                                                                                                                                                                                                                                                               | <b>Results</b> |
|---------------------------------|---------------------------------------------------------------------------------------------------------------------------------------------------------------------------------------------------------------------------------------------------------------------------------------------------------------------------------------------------------------------------------------------------------------------------------------------------------------------------------------------------------------------------------------------------------------------------------------------------------------------------------------------------------------------------------------------------------------------------------------------------------------------------------------------------------------------------------------------------------------------------------------------------------------------------------------------------------------------------------------------------------------------------------------------------------------------------------------------------------------------------------------------------------------------------------------------------------------------------------------------------------------------------------------------------------------------------------------------------------------------------------------------------------------------------------------------------------------------------------------------------------------------------------------------------------------------------------------------------------------------------------------------------------------------------------------------------------------------------------------------------------------------------------------------------------------------------------------------------------------------------------------------------------------------------------------------------------------------------------------------------------------------------------------------------------------------------------------------------------------------------------------------------------------------------------------------------------------------------------------------------------------------------------------------------------------------------------------------------------------------------------------------------------------------------------------------------------------------------------------------------------------------------------------------------------------|----------------|
| <b>1</b>                        | <b>MH</b> ("Instrument Construction+" OR "Validation Studies" OR "Reproducibility of Results+" OR "Psychometrics+" OR "Observer Bias+" OR "Discriminant Analysis+")                                                                                                                                                                                                                                                                                                                                                                                                                                                                                                                                                                                                                                                                                                                                                                                                                                                                                                                                                                                                                                                                                                                                                                                                                                                                                                                                                                                                                                                                                                                                                                                                                                                                                                                                                                                                                                                                                                                                                                                                                                                                                                                                                                                                                                                                                                                                                                                           |                |
| <b>2</b>                        | <b>TI</b> (reproducib* OR psychometr* OR clinimetr* OR clinometr* OR observer variation OR reliab* OR valid* OR coefficient OR internal consistency OR (cronbach* AND (alpha OR alphas)) OR item correlation* OR item selection* OR item reduction* OR agreement OR precision OR imprecision OR precise values OR test retest OR (test AND retest) OR (reliab* AND (test OR retest)) OR stability OR interrater OR inter rater OR intrarater OR intra rater OR intertester OR inter tester OR intratester OR intra tester OR interobserver OR inter observer OR intraobserver OR intra observer OR intertechnician OR inter technician OR intratechnician OR intra technician OR interexaminer OR inter examiner OR intraexaminer OR intra examiner OR interassay OR inter assay OR intraassay OR intra assay OR interindividual OR inter individual OR intraindividual OR intra individual OR interparticipant OR inter participant OR intraparticipant OR intra participant OR kappa OR kappa's OR kappas OR coefficient of variation OR repeatab* OR ((replicab* OR repeated) AND (measure OR measures OR findings OR result OR results OR test OR tests)) OR generaliza* OR generalisa* OR concordance OR (intraclass AND correlation*) OR discriminative OR known group OR factor analysis OR factor analyses OR factor structure OR factor structures OR dimensionality OR subscale* OR multitrait scaling analysis OR multitrait scaling analyses OR item discriminant OR interscale correlation* OR ((error OR errors) AND (measure*OR correlat* OR evaluat* OR accuracy OR accurate OR precision OR mean)) OR individual variability OR interval variability OR rate variability OR variability analysis OR (uncertainty AND (measurement OR measuring)) OR standard error of measurement OR sensitiv* OR responsive* OR (limit AND detection) OR minimal detectable concentration OR interpretab* OR (small* AND (real OR detectable) AND (change OR difference)) OR meaningful change OR minimal important change OR minimal important difference OR minimally important change OR minimally important difference OR minimal detectable change OR minimal detectable difference OR minimally detectable change OR minimally detectable difference OR minimal real change OR minimal real difference OR minimally real change OR minimally real difference OR ceiling effect OR floor effect OR Item response model OR IRT OR Rasch OR Differential item functioning OR DIF OR computer adaptive testing OR itembank OR cross cultural equivalence) |                |
| <b>3</b>                        | <b>AB</b> (reproducib* OR psychometr* OR clinimetr* OR clinometr* OR observer variation OR reliab* OR valid* OR coefficient OR internal consistency OR (cronbach* AND (alpha OR alphas)) OR item correlation* OR item selection* OR item reduction* OR agreement OR precision OR imprecision OR precise values OR test retest OR (test AND retest) OR (reliab* AND (test OR retest)) OR stability OR interrater OR inter rater OR                                                                                                                                                                                                                                                                                                                                                                                                                                                                                                                                                                                                                                                                                                                                                                                                                                                                                                                                                                                                                                                                                                                                                                                                                                                                                                                                                                                                                                                                                                                                                                                                                                                                                                                                                                                                                                                                                                                                                                                                                                                                                                                             |                |

|                                              |                                                                                                                                                                                                                                                                                                                                                                                                                                                                                                                                                                                                                                                                                                                                                                                                                                                                                                                                                                                                                                                                                                                                                                                                                                                                                                                                                                                                                                                                                                                                                                                                                                                                                                                                                                                                                                                                                                                                                                                                                                                                                                                             |                |
|----------------------------------------------|-----------------------------------------------------------------------------------------------------------------------------------------------------------------------------------------------------------------------------------------------------------------------------------------------------------------------------------------------------------------------------------------------------------------------------------------------------------------------------------------------------------------------------------------------------------------------------------------------------------------------------------------------------------------------------------------------------------------------------------------------------------------------------------------------------------------------------------------------------------------------------------------------------------------------------------------------------------------------------------------------------------------------------------------------------------------------------------------------------------------------------------------------------------------------------------------------------------------------------------------------------------------------------------------------------------------------------------------------------------------------------------------------------------------------------------------------------------------------------------------------------------------------------------------------------------------------------------------------------------------------------------------------------------------------------------------------------------------------------------------------------------------------------------------------------------------------------------------------------------------------------------------------------------------------------------------------------------------------------------------------------------------------------------------------------------------------------------------------------------------------------|----------------|
|                                              | intrarater OR intra rater OR intertester OR inter tester OR intratester OR intra tester OR interobserver OR inter observer OR intraobserver OR intra observer OR intertechnician OR inter technician OR intratechnician OR intra technician OR interexaminer OR inter examiner OR intraexaminer OR intra examiner OR interassay OR inter assay OR intraassay OR intra assay OR interindividual OR inter individual OR intraindividual OR intra individual OR interparticipant OR inter participant OR intraparticipant OR intra participant OR kappa OR kappa's OR kappas OR coefficient of variation OR repeatab* OR ((replicab* OR repeated) AND (measure OR measures OR findings OR result OR results OR test OR tests)) OR generaliza* OR generalisa* OR concordance OR (intraclass AND correlation*) OR discriminative OR known group OR factor analysis OR factor analyses OR factor structure OR factor structures OR dimensionality OR subscale* OR multitrait scaling analysis OR multitrait scaling analyses OR item discriminant OR interscale correlation* OR ((error OR errors) AND (measure*OR correlat* OR evaluat* OR accuracy OR accurate OR precision OR mean)) OR individual variability OR interval variability OR rate variability OR variability analysis OR (uncertainty AND (measurement OR measuring)) OR standard error of measurement OR sensitiv* OR responsive* OR (limit AND detection) OR minimal detectable concentration OR interpretab* OR (small* AND (real OR detectable) AND (change OR difference)) OR meaningful change OR minimal important change OR minimal important difference OR minimally important change OR minimally important difference OR minimal detectable change OR minimal detectable difference OR minimally detectable change OR minimally detectable difference OR minimal real change OR minimal real difference OR minimally real change OR minimally real difference OR ceiling effect OR floor effect OR Item response model OR IRT OR Rasch OR Differential item functioning OR DIF OR computer adaptive testing OR itembank OR cross cultural equivalence) |                |
| <b>4</b>                                     | <b>1 OR 2 OR 3</b>                                                                                                                                                                                                                                                                                                                                                                                                                                                                                                                                                                                                                                                                                                                                                                                                                                                                                                                                                                                                                                                                                                                                                                                                                                                                                                                                                                                                                                                                                                                                                                                                                                                                                                                                                                                                                                                                                                                                                                                                                                                                                                          | <b>1194447</b> |
| <b>Patient-Reported Outcome Measurements</b> |                                                                                                                                                                                                                                                                                                                                                                                                                                                                                                                                                                                                                                                                                                                                                                                                                                                                                                                                                                                                                                                                                                                                                                                                                                                                                                                                                                                                                                                                                                                                                                                                                                                                                                                                                                                                                                                                                                                                                                                                                                                                                                                             |                |
| <b>5</b>                                     | <b>MH</b> ("Patient-Reported Outcomes+" OR "Surveys+" OR "Questionnaires+" OR "Self Report+" OR "Quality of Life+")                                                                                                                                                                                                                                                                                                                                                                                                                                                                                                                                                                                                                                                                                                                                                                                                                                                                                                                                                                                                                                                                                                                                                                                                                                                                                                                                                                                                                                                                                                                                                                                                                                                                                                                                                                                                                                                                                                                                                                                                         |                |
| <b>6</b>                                     | <b>TI</b> ((patient# OR self) <b>N2</b> (report* OR relate* OR declar* OR rating* OR assess* OR examin* OR monitor* OR administer* OR rate* OR rating* or based or appraisal* or appraised or evaluat*) <b>N2</b> (outcome* OR symptom*)) or PROM* Or PRO or PROS OR (quality <b>N2</b> life) OR HRQL or HRQoL or QoL OR HR PRO or HRPRO)                                                                                                                                                                                                                                                                                                                                                                                                                                                                                                                                                                                                                                                                                                                                                                                                                                                                                                                                                                                                                                                                                                                                                                                                                                                                                                                                                                                                                                                                                                                                                                                                                                                                                                                                                                                   |                |
| <b>7</b>                                     | <b>AB</b> ((patient# OR self) <b>N2</b> (report* OR relate* OR declar* OR rating* OR assess* OR examin* OR monitor* OR administer* OR rate* OR rating* or based or appraisal* or appraised or evaluat*) <b>N2</b> (outcome* OR symptom*)) or PROM* Or PRO or PROS OR (quality <b>N2</b> life) OR HRQL or HRQoL or QoL OR HR PRO or HRPRO)                                                                                                                                                                                                                                                                                                                                                                                                                                                                                                                                                                                                                                                                                                                                                                                                                                                                                                                                                                                                                                                                                                                                                                                                                                                                                                                                                                                                                                                                                                                                                                                                                                                                                                                                                                                   |                |

|                                                 |                                                                                                                                                                                                                                                                                                                                                                                                                            |               |
|-------------------------------------------------|----------------------------------------------------------------------------------------------------------------------------------------------------------------------------------------------------------------------------------------------------------------------------------------------------------------------------------------------------------------------------------------------------------------------------|---------------|
| 8                                               | <b>TI</b> ((disability or function* or subjective or utility or utilities or wellbeing or well being) <b>N3</b> (outcome or outcomes or index or indices or instrument or instruments or measure or measures or questionnaire or questionnaires or profile or profiles or scale or scales or score or scores or scoring or status or survey or surveys or measure*))                                                       |               |
| 9                                               | <b>AB</b> ((disability or function* or subjective or utility or utilities or wellbeing or well being) <b>N3</b> (outcome or outcomes or index or indices or instrument or instruments or measure or measures or questionnaire or questionnaires or profile or profiles or scale or scales or score or scores or scoring or status or survey or surveys or measure*))                                                       |               |
| <b>Clinician reported outcomes measurements</b> |                                                                                                                                                                                                                                                                                                                                                                                                                            |               |
| 10                                              | <b>(MH</b> "Outcome Assessment")                                                                                                                                                                                                                                                                                                                                                                                           |               |
| 11                                              | <b>TI</b> (Clinician* reported outcome* or CROS or clinRO or clinROs OR ((clinical or clinician* or expert* or health professional* OR physician* OR doctor*) <b>N2</b> (judgement* or interpretation* or observation* or assessment* or measure*)))                                                                                                                                                                       |               |
| 12                                              | <b>AB</b> (Clinician* reported outcome* or CROS or clinRO or clinROs OR ((clinical or clinician* or expert* or health professional* OR physician* OR doctor*) <b>N2</b> (judgement* or interpretation* or observation* or assessment* or measure*)))                                                                                                                                                                       |               |
| 13                                              | <b>OR/5-12</b>                                                                                                                                                                                                                                                                                                                                                                                                             | <b>924590</b> |
| <b>Peripheral neuropathy</b>                    |                                                                                                                                                                                                                                                                                                                                                                                                                            |               |
| 14                                              | <b>MH</b> (peripheral nervous system diseases or brachial plexus neuropathies+ or complex regional pain syndrome or neuralgia or metatarsalgia or neuritis or polyneuropathies or polyradiculopathy or small fiber neuropathy or neural conduction or peripheral nerves+)                                                                                                                                                  |               |
| 15                                              | <b>TI</b> (PNS disease* or peripheral nervous system disease* or neuropath* or complex regional pain syndrome* or neuralgia* or neuritis or neurodynia* or (nerve* <b>N2</b> (pain* or injur* or disease* or affect* or damage* or degeneration*)) or causalgia* or hyperesthesi* or paresthesi* or hypesthesi* or paralysis or polyneuropath* or polyradiculo* or polyneuritis or burning feet syndrome or metatarsalgia) |               |
| 16                                              | <b>AB</b> (PNS disease* or peripheral nervous system disease* or neuropath* or complex regional pain syndrome* or neuralgia* or neuritis or neurodynia* or (nerve* <b>N2</b> (pain* or injur* or disease* or affect* or damage* or degeneration*)) or causalgia* or hyperesthesi* or paresthesi* or hypesthesi* or paralysis or polyneuropath* or polyradiculo* or polyneuritis or burning feet syndrome or metatarsalgia) |               |
| 17                                              | <b>MH</b> (neurologic manifestations)                                                                                                                                                                                                                                                                                                                                                                                      |               |
| 18                                              | <b>TI</b> ((neurologic* <b>N2</b> (manifestation* or deficit* or sign or signs or symptom* or finding* or dysfunction*)))                                                                                                                                                                                                                                                                                                  |               |
| 19                                              | <b>AB</b> ((neurologic* <b>N2</b> (manifestation* or deficit* or sign or signs or symptom* or finding* or dysfunction*)))                                                                                                                                                                                                                                                                                                  |               |

|             |                                                                                                                                                                                                                                                                                                                                                                                                                                                                                                                                                                                                                                                                                                                                                                                                                     |               |
|-------------|---------------------------------------------------------------------------------------------------------------------------------------------------------------------------------------------------------------------------------------------------------------------------------------------------------------------------------------------------------------------------------------------------------------------------------------------------------------------------------------------------------------------------------------------------------------------------------------------------------------------------------------------------------------------------------------------------------------------------------------------------------------------------------------------------------------------|---------------|
| 20          | MH (sensation disorders+ or sensation+ or evoked potentials+ or nociceptive pain+ or breakthrough pain or facial pain or referred pain or neurotoxicity syndromes or hand-foot syndrome)                                                                                                                                                                                                                                                                                                                                                                                                                                                                                                                                                                                                                            |               |
| 21          | <b>TI</b> ((sensation* or sense* or sensivity or sensorimotor or sensory or somatosensory or nociceptive or somatic or tissue* or tactile or touch* or pinprick or thermal or burning or shooting or deafferentation or differential or referred or percept* or facial or breakthrough) <b>N3</b> (pain* or disorder* or disease* or disturb* or distortion* or discomfort* or dysfunction* or disruption* or impair* or symptom* or change* or abnormal* or mechanical or deficit* or limit* or loss or diminish* or reduc* or amplificat* or hyperesthetic or alter* or affect* or gating or threshold*)) or pain threshold* or hyperalgesi* or allodynia* or formication* or tingling or hypersensitivity or oxyesthesi* or electric shock like or vibration* or nocicept* or neurotoxi* or hand foot syndrome*) |               |
| 22          | <b>AB</b> ((sensation* or sense* or sensivity or sensorimotor or sensory or somatosensory or nociceptive or somatic or tissue* or tactile or touch* or pinprick or thermal or burning or shooting or deafferentation or differential or referred or percept* or facial or breakthrough) <b>N3</b> (pain* or disorder* or disease* or disturb* or distortion* or discomfort* or dysfunction* or disruption* or impair* or symptom* or change* or abnormal* or mechanical or deficit* or limit* or loss or diminish* or reduc* or amplificat* or hyperesthetic or alter* or affect* or gating or threshold*)) or pain threshold* or hyperalgesi* or allodynia* or formication* or tingling or hypersensitivity or oxyesthesi* or electric shock like or vibration* or nocicept* or neurotoxi* or hand foot syndrome*) |               |
| 23          | <b>MH</b> (musculoskeletal, neural, and ocular physiology or muscle fatigue or muscle strength+ or muscle tonus or muscular diseases or neuromuscular manifestations or reflex or muscle weakness or muscle cramp or arthralgia or gait disorders, neurologic+ or motor activity or physical mobility or muscle pain or neuromuscular control or weight-bearing or weight shifting)                                                                                                                                                                                                                                                                                                                                                                                                                                 |               |
| 24          | <b>TI</b> ((motor* or muscle* or muscular or neuromuscular or functional* or movement* or walk* or gait* or balance or strength or tendon* or joint* or reflex* or tonus) <b>N3</b> (pain* or disorder* or disturb* or discomfort* or dysfunction* or disruption* or impair* or symptom* or change* or abnormal* or mechanical or deficit* or limit* or loss or diminish* or reduc* or alter* or disabilit* or postural or weak* or fatigue) or propriocepti* or arthralgia* or myalgia* or polyarthralgia* or numbness or foot drop or footdrop or cramp*)                                                                                                                                                                                                                                                         |               |
| 25          | <b>AB</b> ((motor* or muscle* or muscular or neuromuscular or functional* or movement* or walk* or gait* or balance or strength or tendon* or joint* or reflex* or tonus) <b>N3</b> (pain* or disorder* or disturb* or discomfort* or dysfunction* or disruption* or impair* or symptom* or change* or abnormal* or mechanical or deficit* or limit* or loss or diminish* or reduc* or alter* or disabilit* or postural or weak* or fatigue) or propriocepti* or arthralgia* or myalgia* or polyarthralgia* or numbness or foot drop or footdrop or cramp*)                                                                                                                                                                                                                                                         |               |
| 26          | <b>OR/14-25</b>                                                                                                                                                                                                                                                                                                                                                                                                                                                                                                                                                                                                                                                                                                                                                                                                     | <b>511082</b> |
| <b>CIPN</b> |                                                                                                                                                                                                                                                                                                                                                                                                                                                                                                                                                                                                                                                                                                                                                                                                                     |               |

|                              |                                                                                                                                   |         |
|------------------------------|-----------------------------------------------------------------------------------------------------------------------------------|---------|
| 27                           | TI((chemotherapy induced N2 neuropath*) or CIPN)                                                                                  |         |
| 28                           | AB((chemotherapy induced N2 neuropath*) or CIPN)                                                                                  |         |
| 29                           | 27 OR 28                                                                                                                          | 945     |
| <b>Antineoplastic agents</b> |                                                                                                                                   |         |
| 30                           | MH(antineoplastic agents+)                                                                                                        |         |
| 31                           | TI(antineoplastic* or chemotherap* or ((anticancer or antitumo?) N3 (agent or agents or drug*)))                                  |         |
| 32                           | AB(antineoplastic* or chemotherap* or ((anticancer or antitumo?) N3 (agent or agents or drug*)))                                  |         |
| 33                           | 30 OR 31 OR 32                                                                                                                    | 178257  |
| 34                           | 4 AND 13 AND 26 AND 33                                                                                                            | 1075    |
| 35                           | 4 AND 13 AND 29                                                                                                                   | 161     |
| 36                           | 34 OR 35                                                                                                                          | 1076    |
| <b>Exclusion Filters</b>     |                                                                                                                                   |         |
| 37                           | PT(biography OR case study OR commentary OR directories OR editorial OR interview OR legal case OR letter OR practice guidelines) |         |
| 38                           | MH("Biographies+" OR "Legislation" OR "News+" OR "Serial Publications+")                                                          |         |
| 39                           | 37 or 38                                                                                                                          | 1405631 |
| 40                           | 36 not 39                                                                                                                         | 1050    |

**PsycInfo (OVID)**

| <b>Psychometrics properties</b>                                |                                                                                                                                                                                                                                                                                                                                                                                                                                                                                                                                                                                                                                                                                                                                                                                                                                                                                                                                                                                                                                                                                                                                                                                                                                                                                                                                                                                                                                                                                                                                                                                                                                                                                                                                                                                                                                                                                                                                                                                                                                                                                                                                                                                                                                                                                                                                                                                                                                                                                                                                                                                                                             |                |
|----------------------------------------------------------------|-----------------------------------------------------------------------------------------------------------------------------------------------------------------------------------------------------------------------------------------------------------------------------------------------------------------------------------------------------------------------------------------------------------------------------------------------------------------------------------------------------------------------------------------------------------------------------------------------------------------------------------------------------------------------------------------------------------------------------------------------------------------------------------------------------------------------------------------------------------------------------------------------------------------------------------------------------------------------------------------------------------------------------------------------------------------------------------------------------------------------------------------------------------------------------------------------------------------------------------------------------------------------------------------------------------------------------------------------------------------------------------------------------------------------------------------------------------------------------------------------------------------------------------------------------------------------------------------------------------------------------------------------------------------------------------------------------------------------------------------------------------------------------------------------------------------------------------------------------------------------------------------------------------------------------------------------------------------------------------------------------------------------------------------------------------------------------------------------------------------------------------------------------------------------------------------------------------------------------------------------------------------------------------------------------------------------------------------------------------------------------------------------------------------------------------------------------------------------------------------------------------------------------------------------------------------------------------------------------------------------------|----------------|
| <b>1</b>                                                       | <b>exp psychometrics/ OR Interrater Reliability/ OR Discriminant Validity/</b>                                                                                                                                                                                                                                                                                                                                                                                                                                                                                                                                                                                                                                                                                                                                                                                                                                                                                                                                                                                                                                                                                                                                                                                                                                                                                                                                                                                                                                                                                                                                                                                                                                                                                                                                                                                                                                                                                                                                                                                                                                                                                                                                                                                                                                                                                                                                                                                                                                                                                                                                              | <b>Results</b> |
| <b>2</b>                                                       | (reproducib* OR psychometr* OR clinimetr* OR clinometr* OR observer variation OR reliab* OR valid* OR coefficient OR internal consistency OR (cronbach* AND (alpha OR alphas)) OR item correlation* OR item selection* OR item reduction*). <b>ti,ab</b> OR (agreement OR precision OR imprecision OR precise values). <b>tw</b> OR (test retest OR (test AND retest) OR (reliab* AND (test OR retest)) OR stability OR interrater OR inter rater OR intrarater OR intra rater OR intertester OR inter tester OR intratester OR intra tester OR interobserver OR inter observer OR intraobserver OR intra observer OR intertechnician OR inter technician OR intratechnician OR intra technician OR interexaminer OR inter examiner OR intraexaminer OR intra examiner OR interassay OR inter assay OR intraassay OR intra assay OR interindividual OR inter individual OR intraindividual OR intra individual OR interparticipant OR inter participant OR intraparticipant OR intra participant OR kappa OR kappa's OR kappas OR coefficient of variation). <b>ti,ab</b> OR (repeatab* OR ((replicab* OR repeated) AND (measure OR measures OR findings OR result OR results OR test OR tests))). <b>tw</b> OR (generaliza* OR generalisa* OR concordance OR (intraclass AND correlation*) OR discriminative OR known group OR factor analysis OR factor analyses OR factor structure OR factor structures OR dimensionality OR subscale* OR multitrait scaling analysis OR multitrait scaling analyses OR item discriminant OR interscale correlation* OR ((error OR errors) AND (measure*OR correlat* OR evaluat* OR accuracy OR accurate OR precision OR mean)) OR individual variability OR interval variability OR rate variability OR variability analysis OR (uncertainty AND (measurement OR measuring)) OR standard error of measurement OR sensitiv* OR responsive* OR (limit AND detection) OR minimal detectable concentration OR interpretab* OR (small* AND (real OR detectable) AND (change OR difference)) OR meaningful change OR minimal important change OR minimal important difference OR minimally important change OR minimally important difference OR minimal detectable change OR minimal detectable difference OR minimally detectable change OR minimally detectable difference OR minimal real change OR minimal real difference OR minimally real change OR minimally real difference OR ceiling effect OR floor effect OR Item response model OR IRT OR Rasch OR Differential item functioning OR DIF OR computer adaptive testing OR itembank OR cross cultural equivalence). <b>ti,ab</b> |                |
| <b>3</b>                                                       | <b>1 OR 2</b>                                                                                                                                                                                                                                                                                                                                                                                                                                                                                                                                                                                                                                                                                                                                                                                                                                                                                                                                                                                                                                                                                                                                                                                                                                                                                                                                                                                                                                                                                                                                                                                                                                                                                                                                                                                                                                                                                                                                                                                                                                                                                                                                                                                                                                                                                                                                                                                                                                                                                                                                                                                                               | <b>897151</b>  |
| <b>Patient-Reported Outcome Measurement instruments (PROM)</b> |                                                                                                                                                                                                                                                                                                                                                                                                                                                                                                                                                                                                                                                                                                                                                                                                                                                                                                                                                                                                                                                                                                                                                                                                                                                                                                                                                                                                                                                                                                                                                                                                                                                                                                                                                                                                                                                                                                                                                                                                                                                                                                                                                                                                                                                                                                                                                                                                                                                                                                                                                                                                                             |                |
| <b>4</b>                                                       | "Patient Reported Outcome Measures"/ or Surveys/ OR Questionnaires/ OR Self-Report/ OR exp Quality of Life/ OR Quality of Life Measures/                                                                                                                                                                                                                                                                                                                                                                                                                                                                                                                                                                                                                                                                                                                                                                                                                                                                                                                                                                                                                                                                                                                                                                                                                                                                                                                                                                                                                                                                                                                                                                                                                                                                                                                                                                                                                                                                                                                                                                                                                                                                                                                                                                                                                                                                                                                                                                                                                                                                                    |                |



|                                           |                                                                                                                                                                                                                                                                                                                                                                                                                                                                                                                                                                                 |               |
|-------------------------------------------|---------------------------------------------------------------------------------------------------------------------------------------------------------------------------------------------------------------------------------------------------------------------------------------------------------------------------------------------------------------------------------------------------------------------------------------------------------------------------------------------------------------------------------------------------------------------------------|---------------|
| 5                                         | ((patient? OR self) adj2 (report* OR relate* OR declar* OR rating* OR assess* OR examin* OR monitor* OR administer* OR rate* OR rating* or based or appraisal* or appraised or evaluat*) adj2 (outcome* OR symptom*) or PROM? Or PRO or PROS OR (quality adj2 life) OR HRQL or HRQoL or QL or QoL OR HR-PRO or HRPRO). <b>ti,ab</b>                                                                                                                                                                                                                                             |               |
| 6                                         | ((disability or function* or subjective or utility or utilities or wellbeing or well being) adj3 (outcome or outcomes or index or indices or instrument or instruments or measure or measures or questionnaire or questionnaires or profile or profiles or scale or scales or score or scores or scoring or status or survey or surveys or measure*)). <b>ti,ab</b>                                                                                                                                                                                                             |               |
| <b>Clinician reported outcomes measur</b> |                                                                                                                                                                                                                                                                                                                                                                                                                                                                                                                                                                                 |               |
| 7                                         | Health Outcomes/                                                                                                                                                                                                                                                                                                                                                                                                                                                                                                                                                                |               |
| 8                                         | (Clinician* reported outcome* or CROS or clinRO or clinROs OR ((clinical or clinician* or expert* or health professional* OR physician* OR doctor*) adj2 (judgement* or interpretation* or observation* or assessment* or measure*))). <b>ti,ab</b>                                                                                                                                                                                                                                                                                                                             |               |
| 9                                         | <b>OR/4-8</b>                                                                                                                                                                                                                                                                                                                                                                                                                                                                                                                                                                   | <b>261776</b> |
| <b>Peripheral neuropathy</b>              |                                                                                                                                                                                                                                                                                                                                                                                                                                                                                                                                                                                 |               |
| 10                                        | Peripheral Neuropathy/ OR Neuropathic Pain/ OR Neuralgia/ OR "Complex Regional Pain Syndrome (Type I)"/ OR Central Nervous System Disorders/                                                                                                                                                                                                                                                                                                                                                                                                                                    |               |
| 11                                        | (PNS disease* or peripheral nervous system disease* or neuropath* or complex regional pain syndrome* or neuralgia* or neuritis or neurodyna* or (nerve* adj2 (pain* or injur* or disease* or affect* or damage* or degeneration*)) or causalgia* or hyperesthesi* or paresthesi* or hypesthesi* or paralysis or polyneuropath* or polyradiculo* or polyneuritis or burning feet syndrome or metatarsalgia). <b>ti,ab</b>                                                                                                                                                        |               |
| 12                                        | Nervous System Disorders/                                                                                                                                                                                                                                                                                                                                                                                                                                                                                                                                                       |               |
| 13                                        | ((neurologic* adj2 (manifestation* or deficit* or sign or signs or symptom* or finding* or dysfunction*))). <b>ti,ab</b>                                                                                                                                                                                                                                                                                                                                                                                                                                                        |               |
| 14                                        | Somatosensory Disorders/ OR Pressure Sensation/ OR Pain Perception/ OR "Sensory Disabilities (Attitudes Toward)"/ OR Sensory Integration Dysfunction/ OR Sensory Gating/ OR Perceptual Disturbances/ OR Sensory System Disorders/ OR Pain Thresholds/ OR Thresholds/ OR Somatosensory Evoked Potentials/ OR "Signal Detection (Perception)"/ OR Evoked Potentials/ OR Somesthetic Perception/ OR Tactual Perception/ OR Somatoform Pain Disorder/ OR Somatoform Disorders/ OR Neurotoxicity/                                                                                    |               |
| 15                                        | ((sensation* or sense* or sensivity or sensorimotor or sensory or somatosensory or nociceptive or somatic or tissue* or tactile or touch* or pinprick or thermal or burning or shooting or deafferentation or differential or referred or percept* or facial or breakthrough) adj3 (pain* or disorder* or disease* or disturb* or distortion* or discomfort* or dysfunction* or disruption* or impair* or symptom* or change* or abnormal* or mechanical or deficit* or limit* or loss or diminish* or reduc* or amplificat* or hyperesthetic or alter* or affect* or gating or |               |

|                              |                                                                                                                                                                                                                                                                                                                                                                                                                                                                                                                                                              |               |
|------------------------------|--------------------------------------------------------------------------------------------------------------------------------------------------------------------------------------------------------------------------------------------------------------------------------------------------------------------------------------------------------------------------------------------------------------------------------------------------------------------------------------------------------------------------------------------------------------|---------------|
|                              | threshold*)) or pain threshold* or hyperalgesi* or allodynia* or formication* or tingling or hypersensitivity or oxyesthesi* or electric shock like or vibration* or nocicept* or neurotoxi* or hand foot syndrome*). <b>ti,ab</b>                                                                                                                                                                                                                                                                                                                           |               |
| <b>16</b>                    | Musculoskeletal Disorders/ OR Neuromuscular Disorders/ OR Muscular Disorders/ OR Myasthenia/ OR Articulation Disorders/ OR Movement Disorders/ OR Proprioception/                                                                                                                                                                                                                                                                                                                                                                                            |               |
| <b>17</b>                    | ((motor* or muscle* or muscular or neuromuscular or functional* or movement* or walk* or gait* or balance or strength or tendon* or joint* or reflex* or tonus) adj3 (pain* or disorder* or disturb* or discomfort* or dysfunction* or disruption* or impair* or symptom* or change* or abnormal* or mechanical or deficit* or limit* or loss or diminish* or reduc* or alter* or disabilit* or postural or weak* or fatigue) or propriocepti* or arthralgia* or myalgia* or polyarthralgia* or numbness or foot drop or footdrop or cramp*). <b>ti,ab</b> . |               |
| <b>18</b>                    | <b>OR/10-17</b>                                                                                                                                                                                                                                                                                                                                                                                                                                                                                                                                              | <b>298714</b> |
| <b>CIPN</b>                  |                                                                                                                                                                                                                                                                                                                                                                                                                                                                                                                                                              |               |
| <b>19</b>                    | ((chemotherapy induced adj2 neuropath*) or CIPN). <b>ti,ab</b>                                                                                                                                                                                                                                                                                                                                                                                                                                                                                               |               |
| <b>Antineoplastic agents</b> |                                                                                                                                                                                                                                                                                                                                                                                                                                                                                                                                                              |               |
| <b>20</b>                    | Antineoplastic Drugs/ OR Chemotherapy/                                                                                                                                                                                                                                                                                                                                                                                                                                                                                                                       |               |
| <b>21</b>                    | (antineoplastic* or chemotherap* or ((anticancer or antitumo?) adj3 (agent or agents or drug*))). <b>ti,ab</b>                                                                                                                                                                                                                                                                                                                                                                                                                                               |               |
| <b>22</b>                    | <b>20 OR 21</b>                                                                                                                                                                                                                                                                                                                                                                                                                                                                                                                                              | <b>7387</b>   |
| <b>23</b>                    | <b>3 AND 9 AND 18 AND 22</b>                                                                                                                                                                                                                                                                                                                                                                                                                                                                                                                                 | <b>94</b>     |
| <b>24</b>                    | <b>3 AND 9 AND 19</b>                                                                                                                                                                                                                                                                                                                                                                                                                                                                                                                                        | <b>28</b>     |
| <b>25</b>                    | <b>23 OR 24</b>                                                                                                                                                                                                                                                                                                                                                                                                                                                                                                                                              | <b>94</b>     |
| <b>Exclusion Filters</b>     |                                                                                                                                                                                                                                                                                                                                                                                                                                                                                                                                                              |               |
| <b>26</b>                    | Exp Biography/ OR Case Report/ OR exp laws/ OR Interviews/ OR Newspapers/ OR Treatment Guidelines/ OR Popular Culture/                                                                                                                                                                                                                                                                                                                                                                                                                                       |               |
| <b>27</b>                    | <b>25 not 26</b>                                                                                                                                                                                                                                                                                                                                                                                                                                                                                                                                             | <b>93</b>     |
